# Supplementary material
Source: PubMed Central journal article supplement (PMC8035315)

Extended Data Figure 4

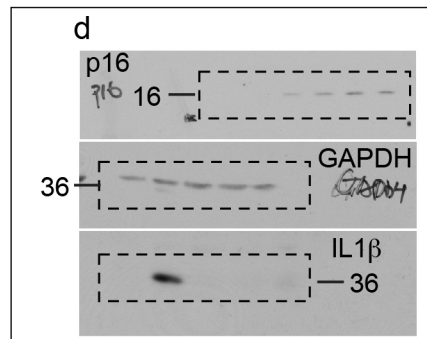

Supplement: NIHMS1678412-supplement-Westernblot_Scan_Extended_Figure_4.pdf [file NIHMS1678412-supplement-Westernblot_Scan_Extended_Figure_4.pdf]

Extended Data Figure 5

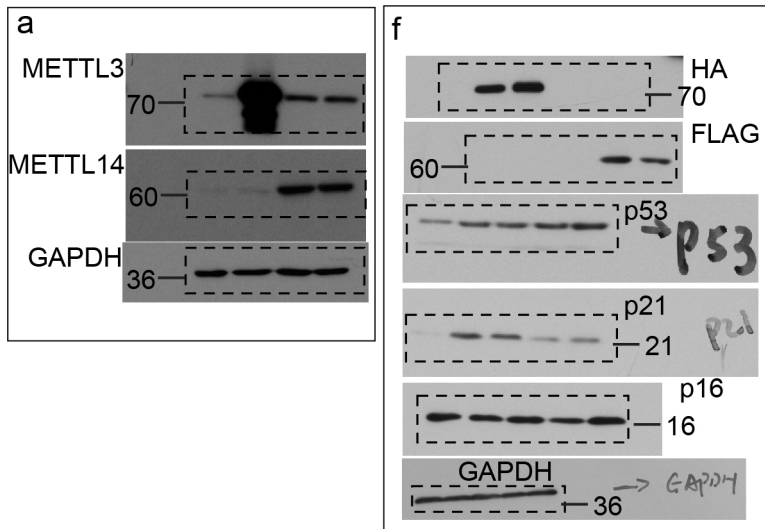

Supplement: NIHMS1678412-supplement-Westernblot_Scan_Extended_Figure_5.pdf [file NIHMS1678412-supplement-Westernblot_Scan_Extended_Figure_5.pdf]
